# Supplementary material for: Liberation of three dihydrogens from two ethene molecules as mediated by the tantalum nitride anion cluster Ta3N2− at room temperature
Source: Royal Society of Chemistry journal article supplement (doi:10.1039/c6cp06896k), 2016-11-29
Supplement: c6cp06896k1.pdf [file c6cp06896k1.pdf]

*Contents:*

1. The methods for determinations of the dissociation rate ( $k_d$ ) of  $\text{Ta}_3\text{N}_2\text{C}_2\text{H}_2^- \rightarrow \text{TS6} \rightarrow \text{I6}$  and the collision rate of  $\text{Ta}_3\text{N}_2\text{C}_2\text{H}_2^-$  with the cooling gas He ( $k_{\text{collision}}$ ).
2. **Table S1:** DFT calculated and experimental bond dissociation energies.
3. **Table S2:** Wiberg bond orders of some important bonds in  $\text{Ta}_3\text{N}_2^-$  and  $\text{Ta}_3\text{N}_2\text{C}_2^-$  at B3LYP functional level.
4. **Fig. S1:** DFT-calculated structures of  $\text{Ta}_3\text{N}_2^-$ .
5. **Fig. S2:** DFT-calculated structures and relative energies of  $\text{Ta}_3\text{C}_2\text{H}_4^-$ .
6. **Figs. S3-S4:** DFT-calculated potential energy surfaces (PESs) for other reaction pathways of  $\text{Ta}_3\text{N}_2^-$  with  $\text{C}_2\text{H}_4$ .
7. **Fig. S5:** DFT calculated PESs for the reactions of singlet  $\text{Ta}_3\text{N}_2^-$  and singlet  $\text{Ta}_3\text{N}_2\text{C}_2^-$  with  $\text{C}_2\text{H}_4$ .
8. **Fig. S6:** DFT calculated Mulliken spin densities on Ta1-Ta3 atoms.
9. **References.**

**The methods for determinations of the dissociation rate ( $k_d$ ) of  $\text{Ta}_3\text{N}_2\text{C}_2\text{H}_2^- \rightarrow \text{TS6} \rightarrow \text{I6}$  and the collision rate of  $\text{Ta}_3\text{N}_2\text{C}_2\text{H}_2^-$  with the cooling gas He ( $k_{\text{collision}}$ ).**

The Rice-Ramperger-Kassel-Marcus (RRKM) theory calculations are performed to estimate the dissociation rate ( $k_d$ ) of  $\text{Ta}_3\text{N}_2\text{C}_2\text{H}_2^- \rightarrow \text{TS6} \rightarrow \text{I6}$  by using the following equation<sup>1</sup>:

$$k(E) = N^\ddagger(E - E^\ddagger) / \rho(E) / h \quad (1)$$

in which  $\rho(E)$  denotes the density of states of the meta-stable intermediates at the energy  $E$  [ $= E_1$  (binding energy of  $\text{Ta}_3\text{N}_2\text{C}_2\text{H}_2^-$ ) +  $E_2$  (vibrational energy of  $\text{Ta}_3\text{N}_2\text{C}_2\text{H}_2^-$ ) +  $E_3$  (center-of-mass collisional energy)],  $N^\ddagger(E - E^\ddagger)$  is the total number of states of the transition state with a barrier  $E^\ddagger$ , and  $h$  is the Planck constant.  $E_1$ ,  $E_2$ ,  $E^\ddagger$  and vibrational frequencies are all from the DFT calculations. In this system, the values of  $E_1$ ,  $E_2$ , and  $E_3$  are 2.77, 0.148, and 0.039 eV, respectively. Therefore,  $k_d$  is estimated to be  $9.7 \times 10^8 \text{ s}^{-1}$ .

The effective pressure ( $P_2$ ) of the cooling gas He is around 3.0 Pa in the ion trap.<sup>2</sup> The collision rate of  $\text{Ta}_3\text{N}_2\text{C}_2\text{H}_2^-$  with He atoms is  $6.9 \times 10^5 \text{ s}^{-1}$ , estimated by the following equation<sup>3</sup>:

$$k_{\text{collision}} = P_2 \sqrt{\frac{8\pi}{m_{\text{He}} k_B T}} (r_{\text{He}} + r)^2 \quad (2)$$

in which  $m_{\text{He}}$  is the mass of He atom,  $r_{\text{He}}$  is the van der Waals radius of He atom (1.40 Å),  $r$  is the radius of  $\text{Ta}_3\text{N}_2\text{C}_2\text{H}_2^-$  (4.10 Å),  $k_B$  is the Boltzmann constant, and  $T$  is the temperature of the reactor. The radius of  $\text{Ta}_3\text{N}_2\text{C}_2\text{H}_2^-$  is calculated by  $r = (d_{\text{N-H}} + r_{\text{H}} + r_{\text{N}})/2$ , in which  $d_{\text{N-H}}$  is the distance between the N and the H atom (5.45 Å) in  $\text{Ta}_3\text{N}_2\text{C}_2\text{H}_2^-$  and  $r_{\text{H}}$  (1.20 Å) and  $r_{\text{N}}$  (1.55 Å) are the van der Waals radii of H atom and N atoms, respectively.

**Table S1.** DFT-calculated and experimental bond dissociation energies. The values are in unit of eV.

|                       | Methods      | Ta–N        | N–N           | C–H           | N–H         |
|-----------------------|--------------|-------------|---------------|---------------|-------------|
| Experiment            | Value        | 6.33±0.8    | 9.79±<br>0.01 | 3.51±<br>0.01 | 3.40 ± 0.16 |
|                       | Reference    |             |               | 4             |             |
| Hybrid<br>Functionals | <b>B3LYP</b> | <b>6.30</b> | <b>9.64</b>   | <b>3.48</b>   | <b>3.50</b> |
|                       | B1LYP        | 6.00        | 9.37          | 3.42          | 3.43        |
|                       | B3P86        | 6.59        | 9.82          | 3.58          | 3.61        |
|                       | B3PW91       | 6.34        | 9.47          | 3.41          | 3.41        |
|                       | M05          | 6.68        | 9.40          | 3.44          | 3.36        |
|                       | M052X        | 5.65        | 9.50          | 3.4           | 3.33        |
|                       | PBE1PBE      | 6.26        | 9.45          | 3.37          | 3.37        |
|                       | X3LYP        | 6.26        | 9.61          | 3.47          | 3.49        |
|                       | M06          | 6.84        | 9.31          | 3.42          | 3.28        |
|                       | M062X        | 6.01        | 9.48          | 3.38          | 3.29        |
|                       | BHandHLYP    | 5.09        | 8.66          | 3.35          | 3.30        |
| Pure<br>Functionals   | BPW91        | 7.05        | 9.98          | 3.42          | 3.47        |
|                       | BLYP         | 6.97        | 10.13         | 3.5           | 3.58        |
|                       | BP86         | 7.25        | 10.29         | 3.6           | 3.69        |
|                       | BPBE         | 7.07        | 9.98          | 3.41          | 3.46        |
|                       | M06L         | 6.57        | 9.45          | 3.39          | 3.28        |
|                       | PBE          | 7.25        | 10.27         | 3.46          | 3.53        |
|                       | TPSS         | 6.73        | 9.57          | 3.57          | 3.60        |

**Table S2.** Wiberg bond orders of some important bonds in  $\text{Ta}_3\text{N}_2^-$  and  $\text{Ta}_3\text{N}_2\text{C}_2^-$  (shown in Figure 3) at B3LYP functional level.

|         | $\text{Ta}_3\text{N}_2^-$ | $\text{Ta}_3\text{N}_2\text{C}_2^-$ |
|---------|---------------------------|-------------------------------------|
| N1-Ta1  | 1.4                       | 1.4                                 |
| N1-Ta3  | 1.3                       | 1.4                                 |
| N2-Ta2  | 1.5                       | 1.4                                 |
| N2-Ta3  | 1.2                       | 1.4                                 |
| Ta1-Ta2 | 2.2                       | 0.6                                 |
| Ta1-Ta3 | 1.6                       | 0.3                                 |
| Ta2-Ta3 | 0.8                       | 0.3                                 |
| C1-Ta1  | -                         | 1.7                                 |
| C1-Ta2  | -                         | 1.7                                 |
| C2-Ta1  | -                         | 1.2                                 |
| C2-Ta2  | -                         | 1.2                                 |
| C2-Ta3  | -                         | 1.2                                 |

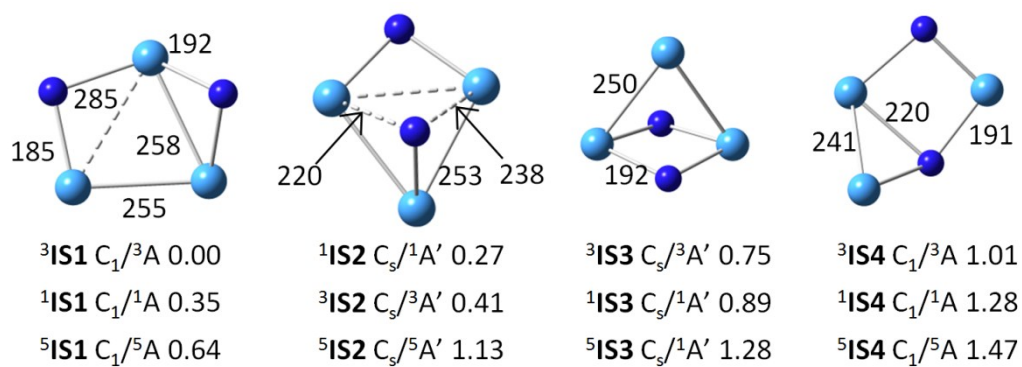

**Fig. S1:** DFT-calculated structures and relative energies of  $\text{Ta}_3\text{N}_2^-$ . The point group and electronic state are given under each structure. Some bond lengths are given in pm. The superscripts indicate the spin states.

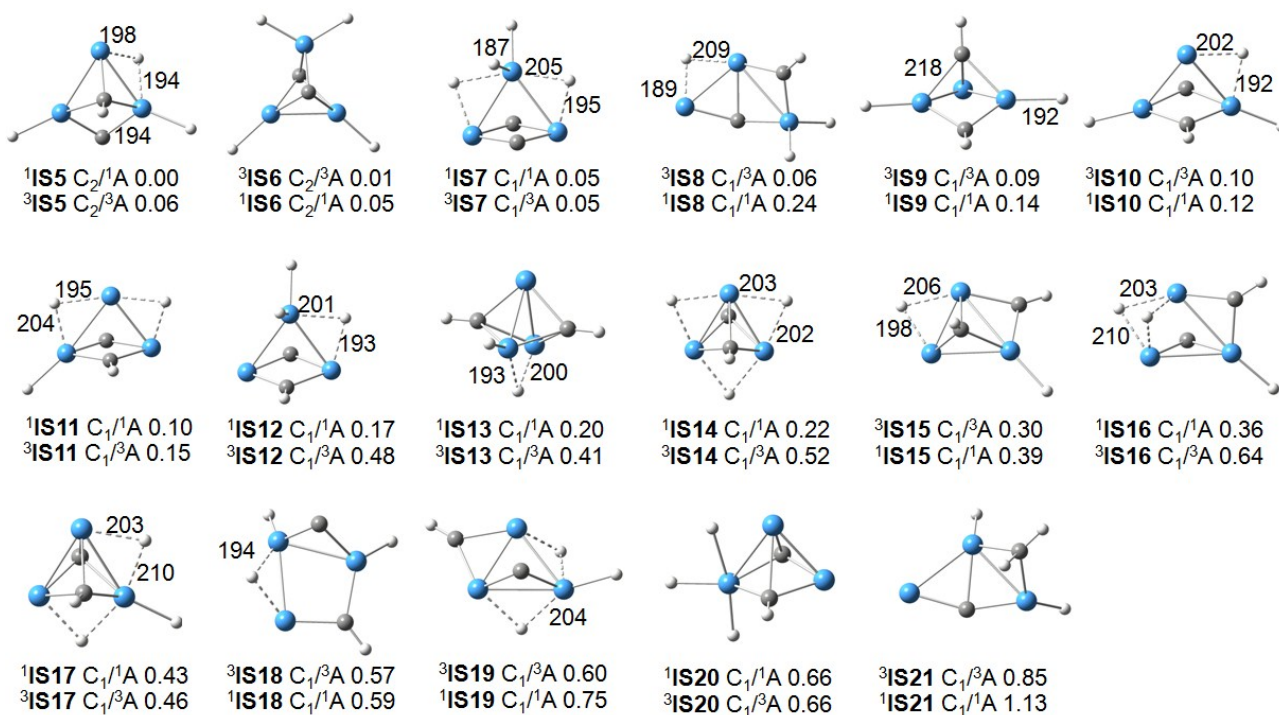

**Fig. S2:** DFT-calculated structures and relative energies of Ta<sub>3</sub>C<sub>2</sub>H<sub>4</sub><sup>-</sup>. The point group and electronic state are given under each structure. Some bond lengths are given in pm. The superscripts indicate the spin states.

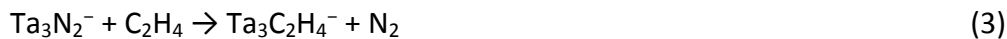

The reaction 3 is thermally unavailable since it is endothermic. The zero-point vibration corrected energies ( $\Delta H_{0K}$ ) of this reaction is around 0.8 eV with respect to the separated reactants.

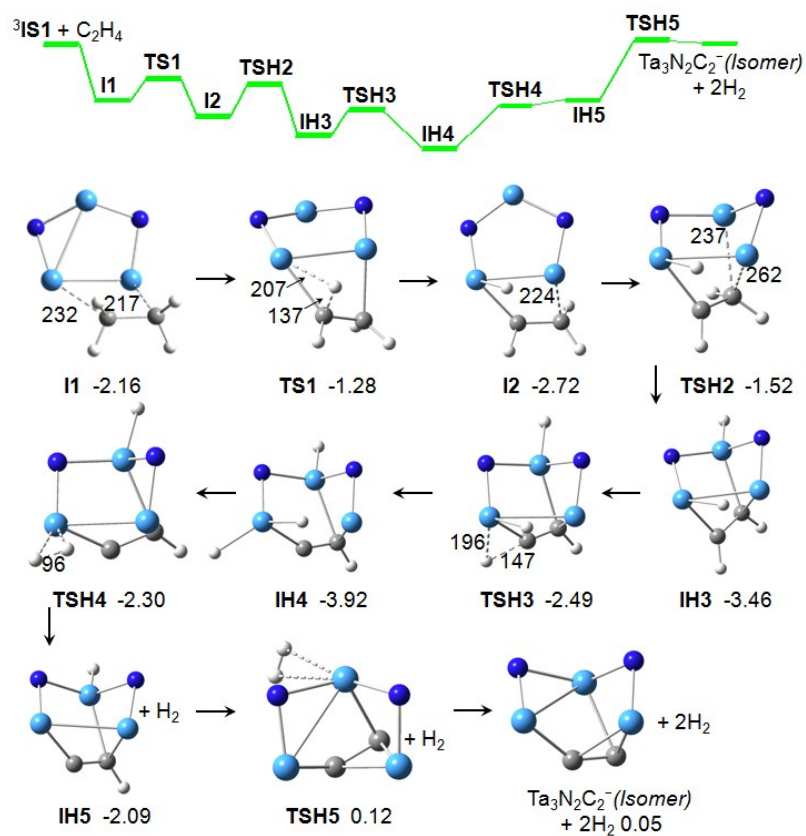

**Fig. S3:** DFT-calculated potential energy surface (PES) without C=C bond cleavage for the reaction of  $\text{Ta}_3\text{N}_2^-$  with  $\text{C}_2\text{H}_4$ . The zero-point vibration corrected energies ( $\Delta H_{0K}$  in eV) of the reaction intermediates, transition states, and products with respect to the separated reactants are given. The spin states are triplets.





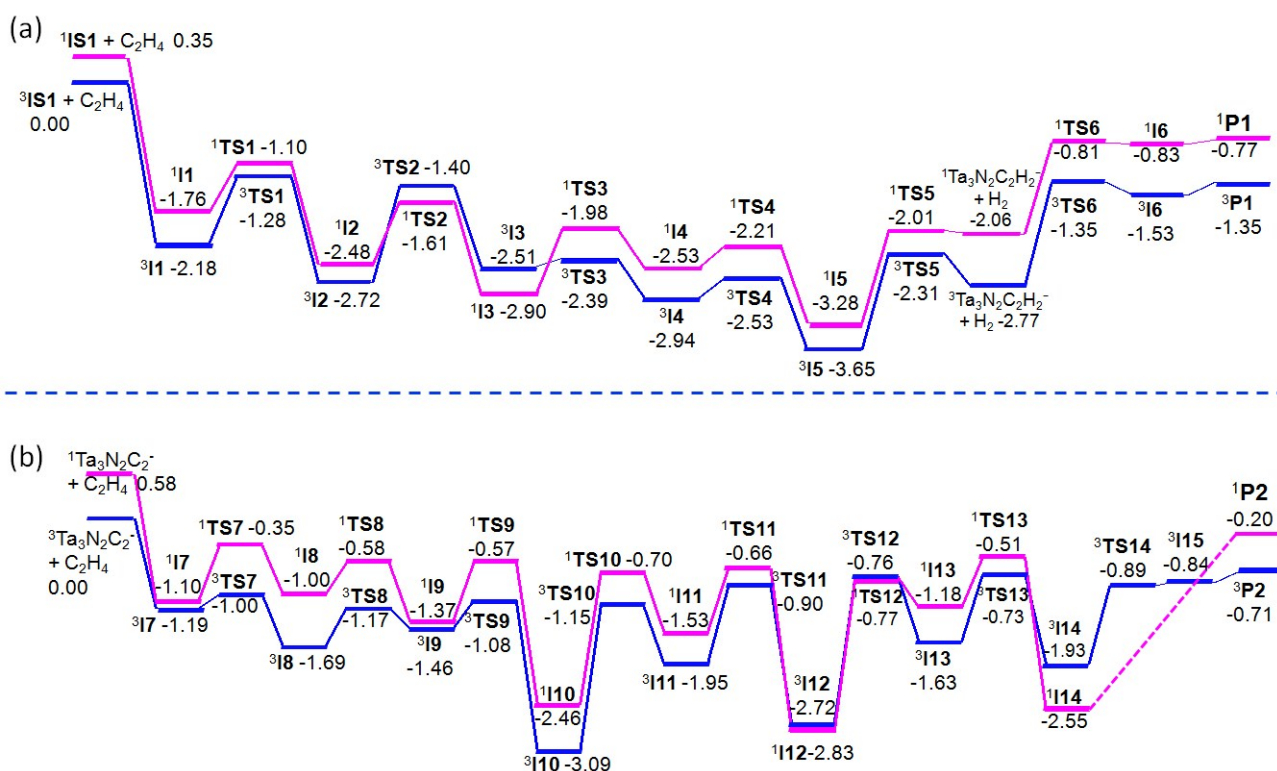

**Fig. S5:** DFT calculated PESs for the reactions of  $\text{Ta}_3\text{N}_2^-$  and  $\text{Ta}_3\text{N}_2\text{C}_2^-$  with  $\text{C}_2\text{H}_4$ . The zero-point vibration corrected energies ( $\Delta H_{0\text{K}}$  in eV) of the reaction intermediates, transition states, and products with respect to the separated reactants are given. The superscripts indicate the spin states of species. The structures of singlet intermediates and transition states are not shown herein, which are similar to those on triplet potential energy surface. The singlet  $^1\text{TS14}$  and  $^1\text{I15}$  cannot be located on the PES.

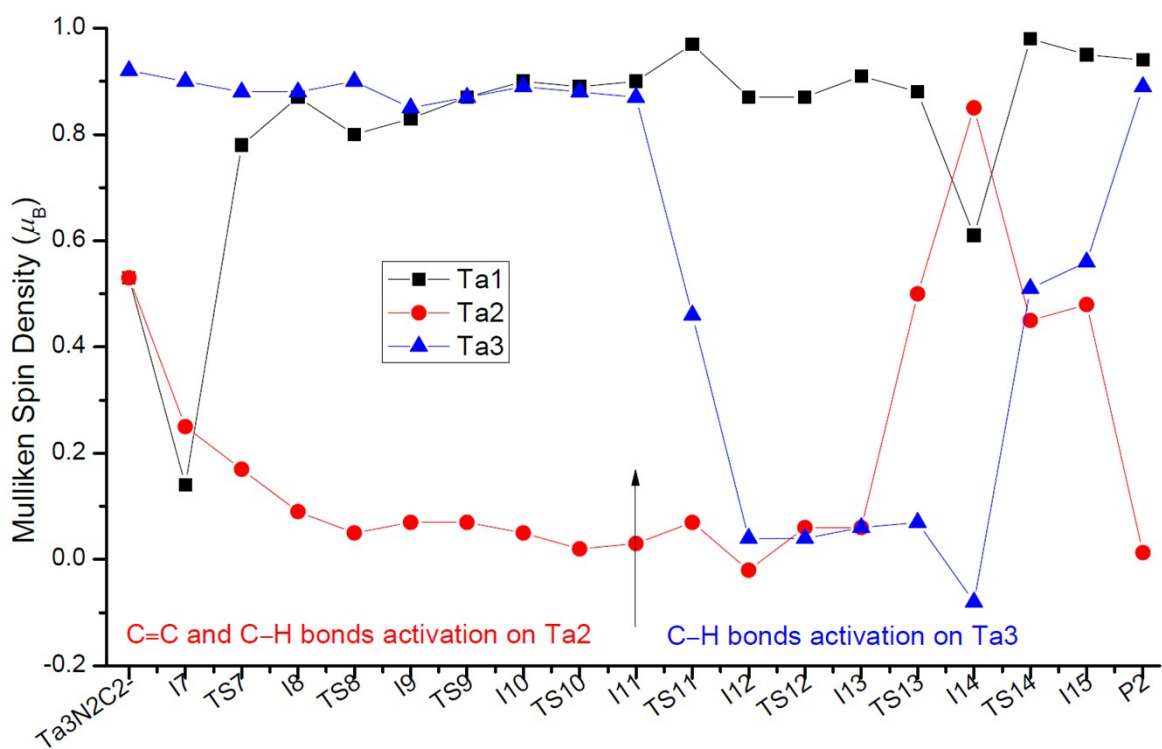

**Fig. S6:** DFT calculated Mulliken spin densities (in parentheses with unit of  $\mu_B$ ) on Ta1-Ta3 atoms along the reaction pathway of  $\text{Ta}_3\text{N}_2\text{C}_2^-$  with  $\text{C}_2\text{H}_4$  shown in Fig. 4 of the main text.

## References

- 1 W. Xue, Z.-C. Wang, S.-G. He, Y. Xie, E. R. Bernstein, *J. Am. Chem. Soc.* 2008, **130**, 15879-15888.
- 2 Z. Yuan, Z.-Y. Li, Z.-X. Zhou, Q.-Y. Liu, Y.-X. Zhao, S.-G. He, *J. Phys. Chem. C* 2014, **118**, 14967-14976.
- 3 a) T. M. Bernhardt, *Int. J. Mass Spectrom.* 2005, **243**, 1-29; b) Y.-X. Zhao, Z.-Y. Li, Z. Yuan, X.-N. Li, S.-G. He, *Angew. Chem. Int. Ed.* 2014, **53**, 9482-9486.
- 4 D. R. Lide, *CRC Handbook of Chemistry and Physics*, 84th ed., CRC Press Inc., Boca Raton, FL, **2003**.
